# Supplementary material for: A Woman With “Polycystic Kidney Disease”
Source: PubMed Central journal article supplement — Kidney Int Rep. 2020 May 29;5(8):1367–70. doi: 10.1016/j.ekir.2020.05.026 (PMC7403545; doi:10.1016/j.ekir.2020.05.026), 2020-05-29
Supplement: mmc1.pdf [file mmc1.pdf]

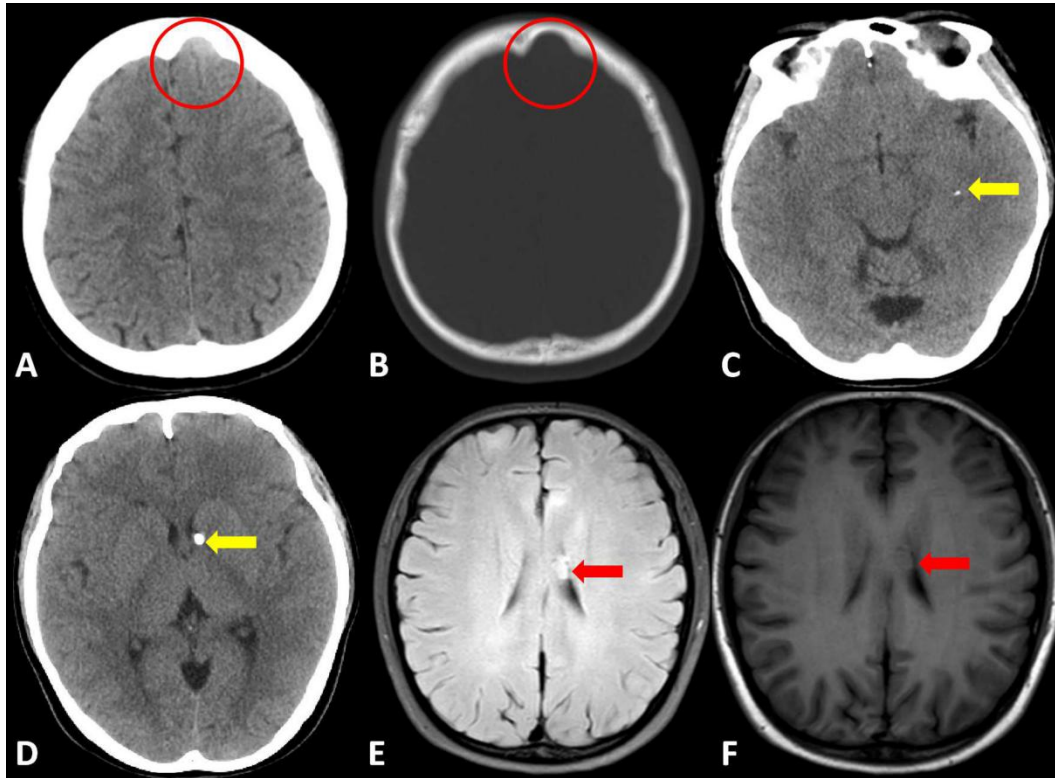

**Supplementary Figure S1: Cranial computed tomography (CT) and magnetic resonance imaging (MRI).** Cranial CT demonstrated (A-B). a slightly high density nodular shadow with a clear boundary in the left temporal lobe which measured  $14 \times 10\text{mm}$  (red circles) and (C-D). multiple calcified nodules (yellow arrows). (E-F). Brain MRI demonstrated tubercles and calcified nodules in the left lateral ventricle and subcortical demyelination (red arrows).

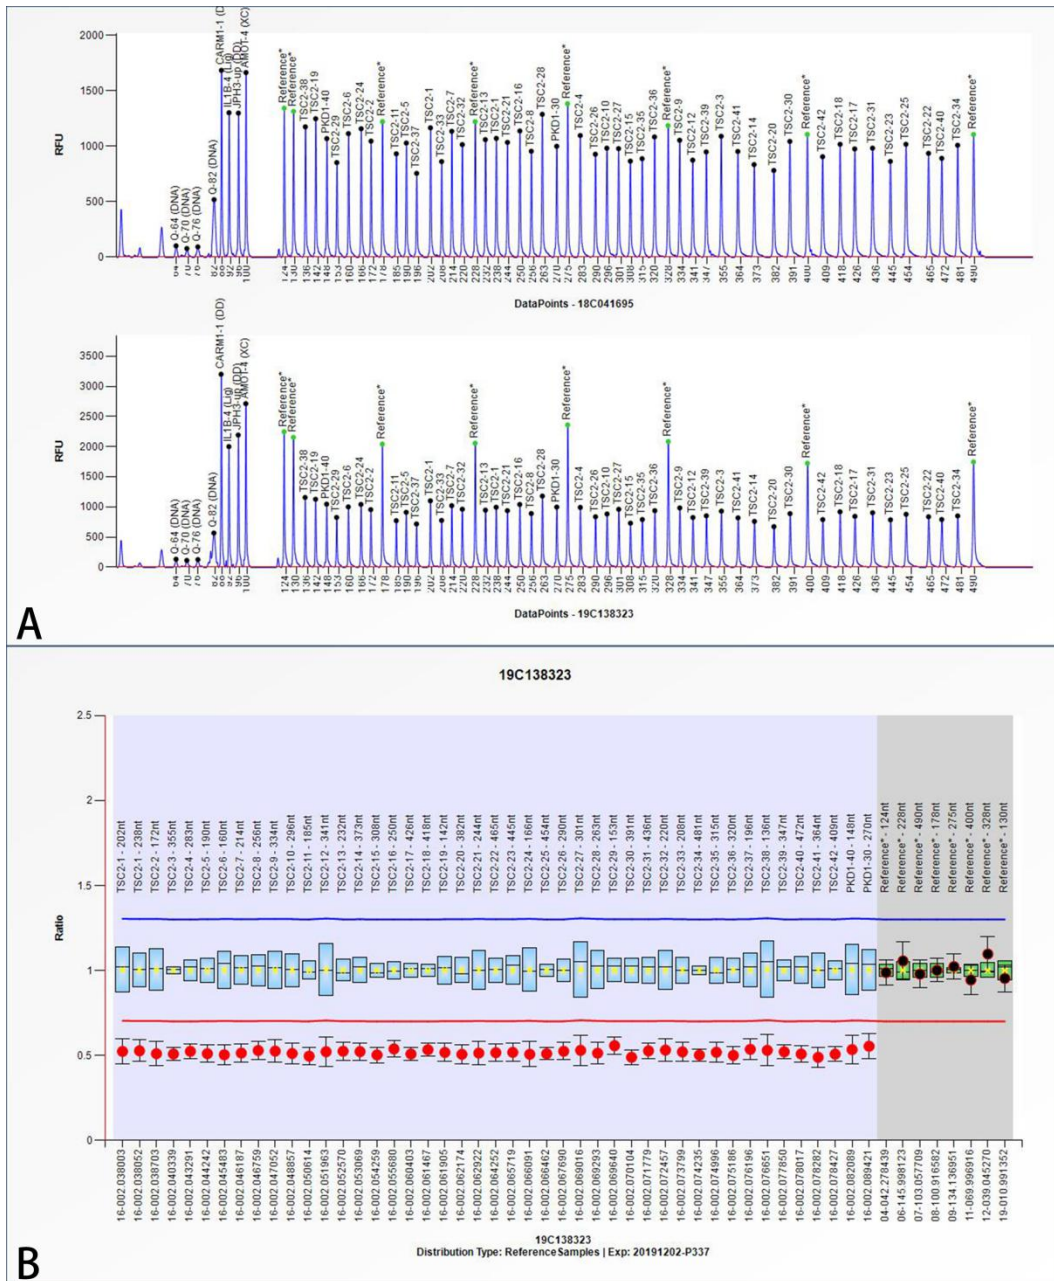

**Supplementary Figure S2: Using multiplex ligation-dependent probe amplification to do TSC2 genetic detection (Normal control: 18C041695, Patient sample: 19C138323).** (A). Compared with normal control, patient's output indicates the deletions occur in whole *TSC2* and extend into neighbouring *PKD1*. (B). The dots present fluorescence intensity. Black dots between 0.7 and 1.3 present normal condition. Red dots show reductions of exon 1-42 in the *TSC2* gene and exon 30 and 40 in the *PKD1* gene by half of genomic quantity more intuitively, it means heterozygous deletions.

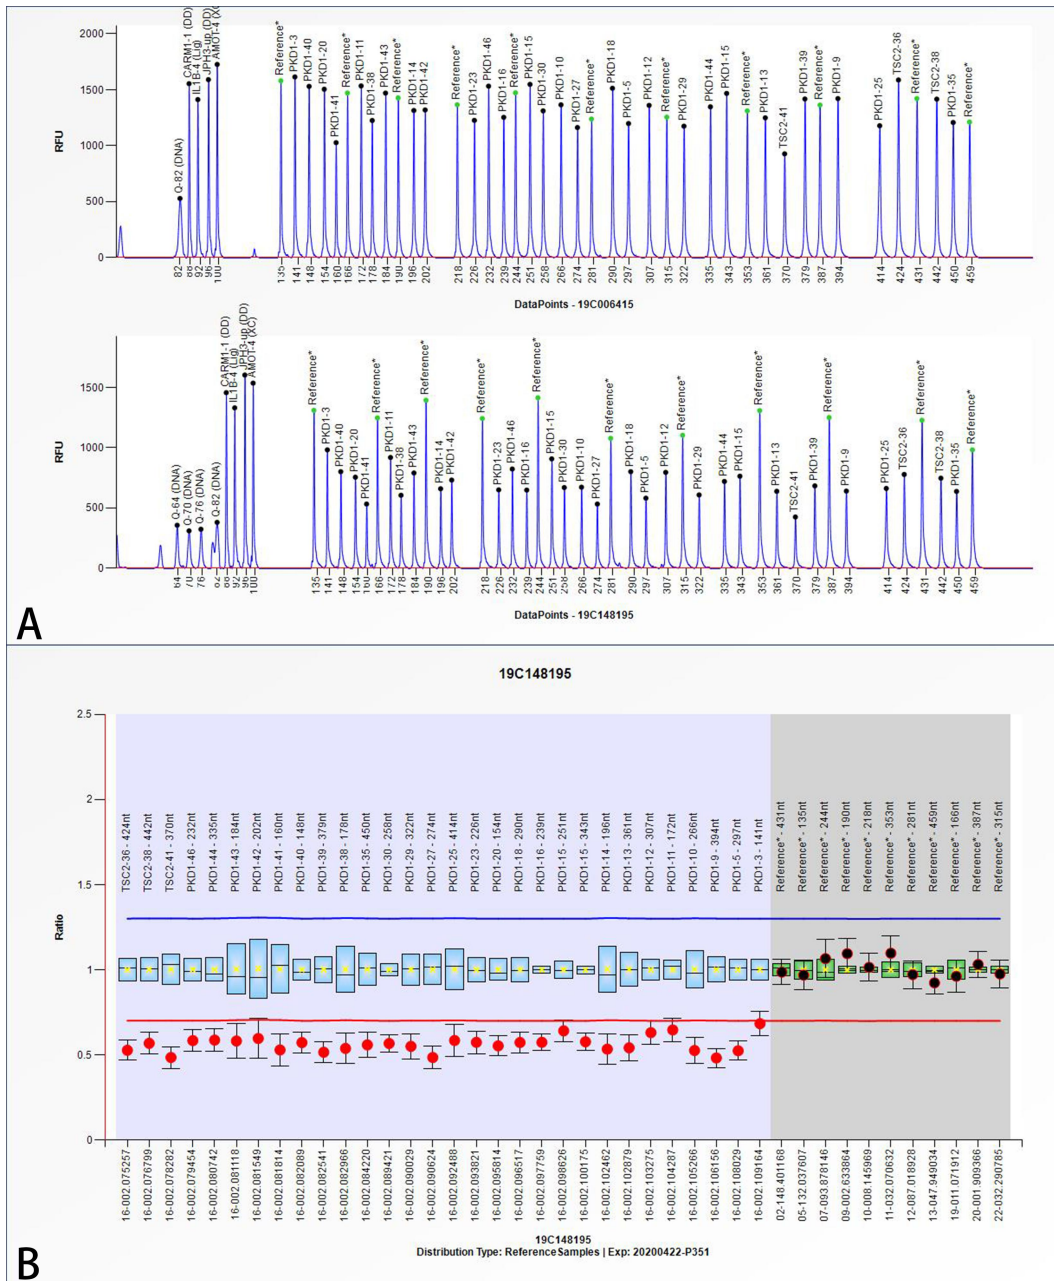

**Supplementary Table S1: Diagnostic criteria for TSC.**

\* Includes tubers and cerebral white matter radial migration lines.

|                           |                                                                                    |                                        |
|---------------------------|------------------------------------------------------------------------------------|----------------------------------------|
| Major features            | 1. Hypomelanotic macules ( $\geq 3$ , at least 5 mm diameter)                      | 6. Cortical dysplasias*                |
|                           | 2. Angiofibromas ( $\geq 3$ ) or fibrous cephalic plaque                           | 7. Subependymal nodules                |
|                           | 3. Ungual fibromas ( $\geq 2$ )                                                    | 8. Subependymal giant cell astrocytoma |
|                           | 4. Shagreen patch                                                                  | 9. Cardiac rhabdomyoma                 |
|                           | 5. Multiple retinal hamartomas                                                     | 10. Lymphangiomyomatosis (LAM)         |
|                           |                                                                                    | 11. Angiomyolipomas ( $\geq 2$ )       |
| Minor features            | 1. "Confetti" skin lesions                                                         | 4. Retinal achromic patch              |
|                           | 2. Dental enamel pits ( $\geq 3$ )                                                 | 5. Multiple renal cysts                |
|                           | 3. Intraoral fibromas ( $\geq 2$ )                                                 | 6. Nonrenal hamartomas                 |
| Genetic detection         | 1. <i>TSC1</i> pathogenic mutation                                                 | 2. <i>TSC2</i> pathogenic mutation     |
| <b>Definite diagnosis</b> | I. Two major features (exclude only exists major feature 10 and 11)                |                                        |
|                           | II. One major feature with two or more than two minor features                     |                                        |
|                           | III. The identification of either a <i>TSC1</i> or <i>TSC2</i> pathogenic mutation |                                        |
| <b>Possible diagnosis</b> | I. One major feature                                                               |                                        |
|                           | II. One major feature and one minor feature                                        |                                        |
|                           | III. Two or more than two minor features                                           |                                        |

**Supplementary Table S2: Differential diagnosis of Tuberous sclerosis complex (TSC) and Polycystic kidney disease (PKD).**

| Differential points | Tuberous sclerosis complex (TSC)                                                                                 | Polycystic kidney disease (PKD)                                                                                                                                                                       |
|---------------------|------------------------------------------------------------------------------------------------------------------|-------------------------------------------------------------------------------------------------------------------------------------------------------------------------------------------------------|
| Family history      | Frequently (Autosomal dominant inheritance, may sporadic)                                                        | Frequently (Autosomal dominant inheritance, recessive dominant inheritance, may sporadic)                                                                                                             |
| First diagnosis     | Usually children                                                                                                 | Usually adults (ADPKD)<br>Usually children (ARPKD)                                                                                                                                                    |
| Typical features    | Triad syndrome includes skin lesions, mental retardation and seizure.                                            | None                                                                                                                                                                                                  |
| Renal damages       | PKD usually combines with renal angiomyolipomas (HU is inhomogeneous: high-low density, irregular calcification) | Only PKD (HU is homogeneous: low density, annular calcification)                                                                                                                                      |
| Extra renal damages | May have multiple organ damages, for example skin, brain, heart, lung and etc (Supplementary Table 1).           | May have multiple organ damages, for example cysts of liver, pancreas, seminal vesicle, spleen and arachnoid, extracranial aneurysm and etc. (ADPKD)<br>May have congenital hepatic fibrosis. (ARPKD) |
| Genetic detection   | <i>TSC1</i> or <i>TSC2</i> pathogenic mutation                                                                   | <i>PKD1</i> or <i>PKD2</i> pathogenic mutation                                                                                                                                                        |
